# Supplementary material for: Quantitative Trait Locus Mapping for Drought Tolerance in Soybean Recombinant Inbred Line Population
Source: MDPI journal article supplement (doi:10.3390/plants10091816), 2021-08-31
Supplement: s1 [file s1]

# Quantitative trait locus mapping for drought tolerance in soybean recombinant inbred line population

Sanjeev Kumar Dhungana <sup>1</sup>, Ji-Hee Park <sup>1,\*</sup>, Jae-Hyeon Oh <sup>2</sup>, Beom-Kyu Kang <sup>1</sup>, Jeong-Hyun Seo <sup>1</sup>, Jung-Sook Sung <sup>1</sup>, Hong-Sik Kim <sup>3</sup>, Sang-Ouk Shin <sup>1</sup>, In-Yeol Baek <sup>1</sup> and Chan-Sik Jung <sup>1</sup>

<sup>1</sup> Upland Crop Breeding Research Division, Department of Southern Area Crop Science, National Institute of Crop Science, Rural Development Administration, Miryang 50424, Republic of Korea; [sanjeev@korea.kr](mailto:sanjeev@korea.kr) (S.K.D.), [heeya91@korea.kr](mailto:heeya91@korea.kr) (J.-H.P.), [hellobk01@korea.kr](mailto:hellobk01@korea.kr) (B.-K.K.), [next0501@korea.kr](mailto:next0501@korea.kr) (J.-H.S.), [sis31@korea.kr](mailto:sis31@korea.kr) (J.-S.S.), [shinso32@korea.kr](mailto:shinso32@korea.kr) (S.-O.S.), [baekiy@korea.kr](mailto:baekiy@korea.kr) (I.-Y.B.), [jung100@korea.kr](mailto:jung100@korea.kr) (C.-S.J.)

<sup>2</sup> Gene Engineering Division, Department of Agricultural Biotechnology, National Institute of Agricultural Sciences, Rural Development Administration, Jeonju 54874, Republic of Korea; [jhoh8288@korea.kr](mailto:jhoh8288@korea.kr)

<sup>3</sup> Crop Post-Harvest Technology Division, Department of Central Area Crop Science, National Institute of Crop Science, Rural Development Administration, Suwon 16429, Republic of Korea; [kimhongs@korea.kr](mailto:kimhongs@korea.kr)

\* Correspondence: [heeya91@korea.kr](mailto:heeya91@korea.kr); Tel.: (+82-55-350-1234)

**Name of Journal:** Plants

**Supplementary Table S1.** Marker distribution and length of linkage maps of 20 chromosomes

| Name of chromosome | Number of markers | Linkage map length (cM) | Average distance between adjacent markers (cM) |
|--------------------|-------------------|-------------------------|------------------------------------------------|
| Chromosome1        | 158               | 170.8                   | 1.08                                           |
| Chromosome2        | 153               | 213.18                  | 1.39                                           |
| Chromosome3        | 177               | 213.65                  | 1.21                                           |
| Chromosome4        | 97                | 170.24                  | 1.76                                           |
| Chromosome5        | 87                | 153.82                  | 1.77                                           |
| Chromosome6        | 122               | 199.05                  | 1.63                                           |
| Chromosome7        | 122               | 187.31                  | 1.54                                           |
| Chromosome8        | 113               | 211.63                  | 1.87                                           |
| Chromosome9        | 184               | 192.17                  | 1.04                                           |
| Chromosome10       | 110               | 151.08                  | 1.37                                           |
| Chromosome11       | 87                | 146.01                  | 1.68                                           |
| Chromosome12       | 89                | 157.56                  | 1.77                                           |
| Chromosome13       | 209               | 262.44                  | 1.26                                           |
| Chromosome14       | 108               | 147.19                  | 1.36                                           |
| Chromosome15       | 64                | 145.71                  | 2.28                                           |
| Chromosome16       | 214               | 190.82                  | 0.89                                           |
| Chromosome17       | 85                | 145.84                  | 1.72                                           |
| Chromosome18       | 196               | 188.72                  | 0.96                                           |
| Chromosome19       | 123               | 160.61                  | 1.31                                           |
| Chromosome20       | 150               | 200.57                  | 1.34                                           |
| Whole Genome       | 2648              | 3608.4                  | 1.36                                           |

**Supplementary Table S2.** Correlation between different traits under control and drought conditions

| Trait         | Treatment | Plant height        | Node number          | Branch number        | Pod number          | Biomass   | Leaf area |
|---------------|-----------|---------------------|----------------------|----------------------|---------------------|-----------|-----------|
| Plant height  | Control   | 1                   |                      |                      |                     |           |           |
|               | Drought   | 1                   |                      |                      |                     |           |           |
| Node number   | Control   | 0.595****           | 1                    |                      |                     |           |           |
|               | Drought   | 0.744****           | 1                    |                      |                     |           |           |
| Branch number | Control   | 0.174*              | 0.155 <sup>ns</sup>  | 1                    |                     |           |           |
|               | Drought   | 0.337****           | 0.294***             | 1                    |                     |           |           |
| Pod number    | Control   | 0.192*              | 0.445****            | 0.361****            | 1                   |           |           |
|               | Drought   | 0.287**             | 0.281***             | 0.386****            | 1                   |           |           |
| Biomass       | Control   | 0.221**             | 0.452****            | 0.209*               | 0.851****           | 1         |           |
|               | Drought   | 0.389****           | 0.379****            | 0.209*               | 0.811****           | 1         |           |
| Leaf area     | Control   | 0.100 <sup>ns</sup> | 0.022 <sup>ns</sup>  | -0.135 <sup>ns</sup> | 0.186*              | 0.360**** | 1         |
|               | Drought   | 0.107 <sup>ns</sup> | -0.027 <sup>ns</sup> | 0.106 <sup>ns</sup>  | 0.105 <sup>ns</sup> | 0.281***  | 1         |

<sup>ns</sup>, \*, \*\*, and \*\*\*\* denote non-significant and significant difference at <.05, <.01, <.001, and <.0001, respectively.

**Supplementary Table S3.** Plant height (PH), number of nodes on main stem (NN), number of branches on main stem (BN), number of pods (PN), biomass (BM), and leaf area (LA) under the control (C) and drought (D) in three years

| Trait | Year              | Parents         |        |           |       | RILs  |        |              |              | $H^2$ |                 |
|-------|-------------------|-----------------|--------|-----------|-------|-------|--------|--------------|--------------|-------|-----------------|
|       |                   | PI416937        |        | Cheonsang |       | Mean  |        | Range        |              |       |                 |
|       |                   | C               | D      | C         | D     | C     | D      | C            | D            | C     | D               |
| PH    | 2017              | 82.80           | 83.00  | 81.45     | 81.00 | 94.31 | 85.85  | 40.20–144.50 | 50.00–147.5  | 0.58  | na              |
|       | 2018              | 37.00           | 35.67  | 43.00     | 35.67 | 37.44 | 28.59  | 25.00–51.33  | 17.00–41.67  | 0.89  | 0.85            |
|       | 2019              | 48.67           | 37.00  | 65.00     | 42.00 | 60.02 | 45.87  | 35.33–99.67  | 18.00–80.33  | 0.89  | 0.86            |
|       | Mean <sup>1</sup> | 56.16           | 51.89  | 63.15     | 52.89 | 64.12 | 53.06  | 25.00–144.50 | 17.00–147.50 | 0.33  | 0.40            |
| NN    | 2017              | 15.00           | 16.00  | 14.00     | 15.00 | 14.72 | 15.11  | 8.00–20.00   | 9.00–19.00   | 0.66  | na <sup>b</sup> |
|       | 2018              | 9.67            | 10.00  | 11.00     | 10.00 | 10.38 | 9.27   | 8.00–12.67   | 7.00–12.00   | 0.64  | 0.64            |
|       | 2019              | 13.00           | 11.00  | 13.00     | 11.50 | 12.88 | 12.52  | 9.00–16.33   | 6.00–18.00   | 0.75  | 0.79            |
|       | Mean              | 12.56           | 12.33  | 12.67     | 12.17 | 12.68 | 12.27  | 8.00–20.00   | 6.00–19.00   | 0.42  | 0.20            |
| BN    | 2017              | na <sup>3</sup> | na     | na        | na    | na    | na     | na           | na           | na    | na              |
|       | 2018              | 3.67            | 1.67   | 3.33      | 1.33  | 2.71  | 1.17   | 0.67–5.00    | 0.00–3.67    | 0.71  | 0.77            |
|       | 2019              | 3.67            | 2.67   | 2.00      | 1.00  | 3.75  | 2.76   | 0.00–6.67    | 0.00–6.50    | 0.59  | 0.68            |
|       | Mean              | 3.67            | 2.17   | 2.67      | 1.17  | 3.23  | 1.97   | 0.00–6.67    | 0.00–6.50    | 0.36  | 0.30            |
| PN    | 2017              | 161.5           | 118.00 | 81.5      | 36.00 | 67.79 | 49.17  | 0.00–206.00  | 2.00–168.00  | 0.53  | na              |
|       | 2018              | 17.67           | 19.67  | 27.00     | 19.00 | 24.22 | 12.04  | 9.33–51.33   | 2.00–31.33   | 0.83  | 0.79            |
|       | 2019              | 52.33           | 42.33  | 60.00     | 48.50 | 53.90 | 33.57  | 7.00–140.67  | 1.33–120.00  | 0.74  | 0.73            |
|       | Mean              | 77.17           | 60.00  | 56.17     | 34.50 | 48.81 | 31.44  | 0.00–206.00  | 1.33–168.00  | 0.27  | 0.01            |
| LA    | 2017              | 119.63          | 105.00 | 121.76    | 36.47 | 96.53 | 58.05  | 19.11–165.97 | 11.81–132.2  | 0.53  | 0.34            |
|       | 2018              | 62.72           | 39.43  | 59.11     | 28.57 | 53.86 | 27.92  | 28.40–83.38  | 8.53–72.10   | 0.82  | 0.84            |
|       | 2019              | 37.68           | 34.79  | 72.26     | 28.81 | 51.61 | 25.75  | 14.87–134.74 | 7.91–80.69   | 0.89  | 0.90            |
|       | Mean              | 73.34           | 60.07  | 84.38     | 31.28 | 67.43 | 37.14  | 14.87–165.97 | 7.91–106.10  | 0.36  | 0.16            |
| BM    | 2017              | 480.50          | 303.00 | 247.50    | 68.00 | 189.2 | 127.11 | 18.00–542.00 | 12.00–498.00 | 0.49  | 0.41            |
|       | 2018              | 33.33           | 20.17  | 37.43     | 19.83 | 31.87 | 14.17  | 12.40–65.10  | 2.70–36.77   | 0.78  | 0.83            |
|       | 2019              | 21.05           | 48.83  | 21.64     | 50.50 | 80.61 | 43.24  | 13.67–237.83 | 8.50–50.50   | 0.77  | 0.77            |
|       | Mean              | 189.73          | 124.00 | 128.09    | 46.11 | 58.65 | 34.37  | 6.00–237.83  | 2.70–150.50  | 0.26  | 0.17            |

<sup>1</sup> Average value of three years. <sup>2</sup> Broad-sense heritability. <sup>3</sup> Not available.

**Supplementary Table S4.** Analysis of variance for plant height, number of nodes and branched in main stem, number of pods, biomass, and leaf area of the recombinant inbred line (RIL) population derived from a drought-tolerant 'PI416937' and susceptible 'Cheonsang' parents

| Source of Variation | Plant height |         | Node number |         | Branch number |         | Pod number |         | Biomass |         | Leaf area |         |
|---------------------|--------------|---------|-------------|---------|---------------|---------|------------|---------|---------|---------|-----------|---------|
|                     | F value      | P value | F value     | P value | F value       | P value | F value    | P value | F value | P value | F value   | P value |
| RIL (G)             | 14.87        | <.0001  | 9.41        | <.0001  | 5.87          | <.0001  | 7.66       | <.0001  | 6.52    | <.0001  | 10.21     | <.0001  |
| Year (Y)            | 7428.04      | <.0001  | 2968.5      | <.0001  | 203.16        | <.0001  | 609.91     | <.0001  | 445.64  | <.0001  | 1515.81   | <.0001  |
| Treatment (T)       | 869.32       | <.0001  | 29.76       | <.0001  | 403.22        | <.0001  | 414.86     | <.0001  | 465.21  | <.0001  | 3050.27   | <.0001  |
| G*Y                 | 8.69         | <.0001  | 5.66        | <.0001  | 3.22          | <.0001  | 5.77       | <.0001  | 4.85    | <.0001  | 6.38      | <.0001  |
| G*T                 | 3.11         | <.0001  | 2.83        | <.0001  | 1.2           | 0.0634  | 2.33       | <.0001  | 1.46    | 0.0007  | 3.04      | <.0001  |
| G*Y*T               | 3.54         | <.0001  | 2.96        | <.0001  | 1.61          | <.0001  | 2.37       | <.0001  | 1.62    | <.0001  | 3.45      | <.0001  |
